# Supplementary material for: Structure of the host cell recognition and penetration machinery of a Staphylococcus aureus bacteriophage
Source: PubMed Central journal article supplement (PMC7048315; doi:10.1371/journal.ppat.1008314), 2020-02-18
Supplement: ppat.1008314.s007.pdf [file ppat.1008314.s007.pdf]

| Reference         |         | Match                                   |                     | All equivalent residues |       | Best Matching Residues after pruning |          |       |       |
|-------------------|---------|-----------------------------------------|---------------------|-------------------------|-------|--------------------------------------|----------|-------|-------|
| Protein           | Res     | Protein                                 | # Res               | RMSD (Å)                | # Res | Cutoff (Å)                           | RMSD (Å) | # Res | %     |
| MTPU              | 1-193   | MTPL                                    | 1-193               | 1.50                    | 147   | 2                                    | 0.71     | 128   | 87.1% |
| MTPL              | 1-193   | lambda gpV                              | 1-246               | 15.52                   | 124   | 10                                   | 4.23     | 70    | 56.5% |
| MTPL              | 1-193   | SPP1 gp17.1                             | 1-264               | 13.20                   | 148   | 10                                   | 5.59     | 91    | 61.5% |
| Dit               | 1-314   | SPP1 Dit NTD                            | 1-137               | 6.74                    | 123   | 6                                    | 2.37     | 109   | 88.6% |
| Dit               | 1-314   | SPP1 Dit CTD                            | 138-253             | 8.53                    | 93    | 6                                    | 3.45     | 68    | 73.1% |
| Dit               | 1-314   | TP901-1 Dit NTD                         | 12-147              | 16.33                   | 109   | 6                                    | 1.90     | 69    | 63.3% |
| Dit               | 1-314   | TP901-1 Dit CTD                         | 148-253             | 7.04                    | 91    | 6                                    | 3.99     | 71    | 78.0% |
| Dit               | 1-167   | p2 Dit NTD                              | 1-133               | 16.60                   | 82    | 6                                    | 3.34     | 48    | 58.5% |
| Dit               | 170-314 | p2 Dit CTD                              | 134-144,<br>189-298 | 10.44                   | 82    | 6                                    | 3.25     | 40    | 48.8% |
| Tal               | 2-388   | <i>L. monocytogenes</i> phage A118 gp18 | 3-339               | 6.09                    | 310   | 6                                    | 2.63     | 232   | 74.8% |
| Tal               | 2-388   | phage Mu gp44 (1WRU)                    | 3-346               | 6.55                    | 288   | 6                                    | 3.24     | 193   | 67.0% |
| Tal               | 2-388   | <i>E. coli</i> T6SS c3393               | 15-468              | 11.67                   | 269   | 6                                    | 3.28     | 135   | 50.2% |
| RBP trimer        | 1-636   | phi11 RBP trimer                        | 1-636               | 5.20                    | 1892  | 6                                    | 1.96     | 1604  | 84.8% |
| RBP trimer<br>CTD | 143-636 | phi11 RBP trimer CTD                    | 143-636             | 1.88                    | 1471  | 6                                    | 1.75     | 1460  | 99.3% |
| RBP trimer<br>CTD | 143-636 | P68 Tail fiber CTD trimer               | 151-645             | 18.49                   | 1390  | 6                                    | 2.48     | 755   | 54.3% |
| RBP tower 1       | 445-541 | RBP tower 2                             | 542-636             | 2.64                    | 270   | 6                                    | 2.14     | 257   | 95.2% |
| FibL NTD          | 5-169   | FibU NTD                                | 1-121               | 5.95                    | 227   | 6                                    | 1.89     | 203   | 89.4% |
| FibL NTD          | 5-169   | TP901-1 BppU NTD                        | 1-299               | 12.92                   | 328   | 6                                    | 2.56     | 204   | 62.2% |
