# Supplementary material for: Structure of the host cell recognition and penetration machinery of a Staphylococcus aureus bacteriophage
Source: PubMed Central journal article supplement (PMC7048315; doi:10.1371/journal.ppat.1008314), 2020-02-18
Supplement: ppat.1008314.s008.pdf [file ppat.1008314.s008.pdf]

|                                    | Overall C6<br>Reconstruction          | Tal-focused C3<br>reconstruction | RBP-focused<br>reconstruction | FibL-focused<br>reconstruction | FibU-focused<br>reconstruction |
|------------------------------------|---------------------------------------|----------------------------------|-------------------------------|--------------------------------|--------------------------------|
| <b>Data Collection</b>             |                                       |                                  |                               |                                |                                |
| Microscope                         |                                       |                                  | Titan Krios 300 keV           |                                |                                |
| Detector                           |                                       |                                  | Direct Electron DE-20         |                                |                                |
| Pixel Size (Å)                     |                                       |                                  | 1.21                          |                                |                                |
| Defocus range (µm)                 |                                       |                                  | 0.42-4.9                      |                                |                                |
| <b>Reconstruction</b>              |                                       |                                  |                               |                                |                                |
| Number of particles                | 74,294                                | 43,601                           | 66,861                        | 73,384                         | 58,716                         |
| Software                           | RELION-2.1.0                          |                                  | RELION-3.0-beta-2             |                                |                                |
| Symmetry                           | C6                                    | C3                               | C6                            | C6                             | C6                             |
| Final resolution (FSC=0.143, Å)*   | 3.45                                  | 3.96                             | 3.60                          | 3.69                           | 4.14                           |
| <b>Atomic model refinement</b>     |                                       |                                  |                               |                                |                                |
| Software                           |                                       |                                  | PHENIX v1.15.2; Coot v0.8.9   |                                |                                |
| Resolution limit (Å)**             | 3.75                                  | 4.08                             | 3.64                          | 3.62                           | 3.85                           |
| Model-map correlation (FSC=0.5, Å) | 3.86                                  | 4.21                             | 3.89                          | 3.94                           | 4.15                           |
| Proteins included                  | MTP <sub>U</sub> and MTP <sub>L</sub> | Dit, Tal, and TMP                | RBP                           | FibL                           | FibU                           |
| Chains                             | 12                                    | 12                               | 24                            | 18                             | 12                             |
| Residues                           | 1878                                  | 3105                             | 11,418                        | 3222                           | 1464                           |
| Number of atoms                    |                                       |                                  |                               |                                |                                |
| Protein atoms                      | 28,866                                | 50,376                           | 183,498                       | 50,550                         | 23,916                         |
| Hydrogens                          | 13,956                                | 25,086                           | 89,970                        | 25,008                         | 12,084                         |
| Metal ions                         | 0                                     | 0                                | 6                             | 0                              | 0                              |
| Map CC <sub>box</sub>              | 0.39                                  | 0.52                             | 0.61                          | 0.48                           | 0.59                           |
| Map CC <sub>mask</sub>             | 0.79                                  | 0.77                             | 0.76                          | 0.77                           | 0.77                           |
| RMS bond length (Å)                | 0.008                                 | 0.007                            | 0.006                         | 0.002                          | 0.002                          |
| RMS bond angles (°)                | 1.042                                 | 1.190                            | 1.118                         | 0.959                          | 1.014                          |
| <b>Validation</b>                  |                                       |                                  |                               |                                |                                |
| Ramachandran plot (%)              |                                       |                                  |                               |                                |                                |
| Favored                            | 93.53                                 | 88.77                            | 90.99                         | 86.82                          | 85.69                          |
| Allowed                            | 6.47                                  | 11.23                            | 8.96                          | 13.15                          | 14.31                          |
| Outliers                           | 0                                     | 0                                | 0.05                          | 0.03                           | 0                              |
| Rotamers outliers (%)              | 0                                     | 1.07                             | 0                             | 0.03                           | 0                              |
| Clashscore                         | 10.39                                 | 4.63                             | 4.07                          | 8.88                           | 8.45                           |
| EMRinger score                     | 2.68                                  | 1.39                             | 1.49                          | 2.19                           | 2.57                           |

\*Between half-maps resolution reported by Phenix Comprehensive Validation after automated masking

\*\*Between half-maps resolution reported by RELION-2/3 Postprocessing after masking and FSC correction
